# Supplementary material for: Predictive Value of Prothrombin Time-International Normalized Ratio Albumin Ratio for QTc Prolongation in Patients with Liver Cirrhosis
Source: Research Square preprint supplement (doi:10.21203/rs.3.rs-7608303/v1), 2025-11-14
Supplement: Supplementary file 1 [file 2743bc9adc7edae6ea932a91.docx]

**Table S1.** Univariate analysis for the presence of QTc prolongation

| **Variables** | **OR(95%CI)** | **P-Value** |
| --- | --- | --- |
| **Sex, (n%)** |  |  |
| Male | Ref. |  |
| Female | 0.51 (0.32~0.80) | 0.004 |
| **Age (years)** | 1.02 (1.00~1.04) | 0.068 |
| **SBP (mmHg)** | 1.00 (0.99~1.02) | 0.541 |
| **DBP (mmHg)** | 0.99 (0.98~1.01) | 0.475 |
| **HR (beats/min)** | 1.01 (0.99~1.02) | 0.288 |
| **Etiology, (n%)** |  |  |
| Virus | Ref. |  |
| Alcoholic+Virus | 2.14 (1.25~3.66) | 0.006 |
| Autoimmune | 0.72 (0.30~1.73) | 0.462 |
| Others | 0.61 (0.30~1.25) | 0.179 |
| **Hb (g/L)** | 0.99 (0.99~1.00) | 0.181 |
| **PLT (g/L)** | 1.00 (0.99~1.00) | 0.083 |
| **TBIL (umol/L)** | 1.01 (1.00~1.01) | 0.005 |
| **ALT (U/L)** | 1.00 (1.00~1.01) | 0.096 |
| **ALP (U/L)** | 1.00 (1.00~1.00) | 0.32 |
| **GGT (U/L)** | 1.00 (1.00~1.00) | 0.53 |
| **BUN (mmol/L)** | 1.06 (1.00~1.14) | 0.068 |
| **Cr (umol/L)** | 1.00 (0.99~1.00) | 0.684 |
| **K (mmol/L)** | 0.69 (0.44~1.10) | 0.12 |
| **Na (mmol/L)** | 0.95 (0.91~1.00) | 0.034 |
| **Ca (mmol/L)** | 0.04 (0.01~0.17) | <0.001 |
| **PT (s)** | 1.25 (1.14~1.37) | <0.001 |
| **APTT (s)** | 1.07 (1.05~1.10) | <0.001 |
| **Degree of ascite, (n%)** |  |  |
| No | Ref. |  |
| Mild | 2.47 (1.12~5.45) | 0.026 |
| Moderate-Severe | 2.86 (1.81~4.54) | <0.001 |
| **Classification of Child-Pugh, (n%)** |  |  |
| Class A | Ref. |  |
| Class B-C | 4.82 (3.04~7.66) | <0.001 |
| **MELD Scores** | 1.06 (1.02~1.11) | 0.009 |
| **DM, n (%)** |  |  |
| No | Ref. |  |
| Yes | 2.22 (1.24~3.96) | 0.007 |
| **Infection, n (%)** |  |  |
| No | Ref. |  |
| Yes | 2.22 (1.24~3.96) | 0.007 |

Abbreviations: OR, odds ratio; CI, confidence interval; Ref: reference;

SBP, Systolic blood pressure; DBP, Diastolic blood pressure;

WBC, white blood cell; RBC, Red blood cell; PLT, Platelet; TBIL,

Total Bilirubin; DBIL, Direct Bilirubin; IBIL, [Indirect Bilirubin](javascript:;);

ALT, Alanine Aminotransferase; AST, Aspartate Aminotransferase;

ALP, [Alkaline Phosphatase](javascript:;); GGT, gamma-Glutamyl Transpeptidase;

BUN, Blood urea nitrogen; MELD, Model for end-stage liver disease
